# Supplementary material for: Identification of Late Larval Stage Developmental Checkpoints in Caenorhabditis elegans Regulated by Insulin/IGF and Steroid Hormone Signaling Pathways
Source: PLOS journal article supplement (doi:10.1371/journal.pgen.1004426), 2014-06-19

Figure S2

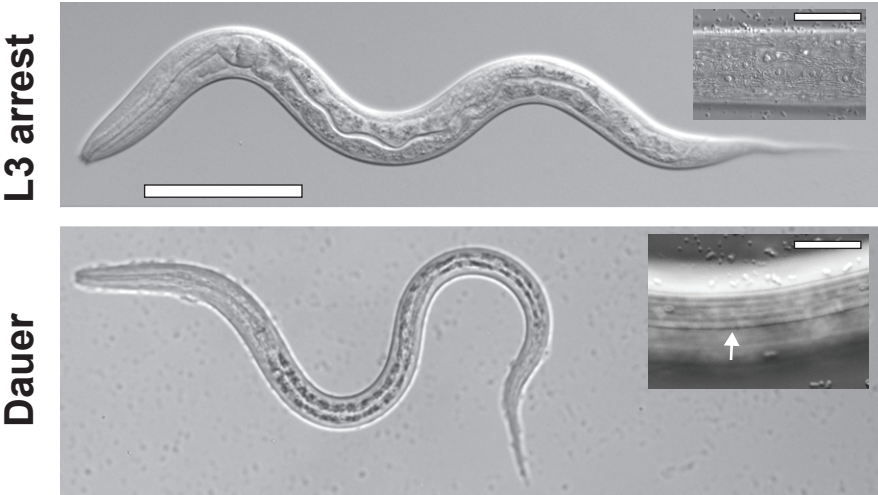

Supplement: S2 (10.1371/journal.pgen.1004426.s002) [file journal.pgen.1004426.s002]
